# Supplementary material for: Are Acute Increases and Variability in Emotion Regulation Strategies Related to Negative Affect and Paranoid Thoughts in Daily Life?
Source: Springer Nature journal article supplement (doi:10.1007/s10608-021-10253-1), 2021-07-26
Supplement: MOESM1 [file 19393706]

**Supplementary Material**

**Table S1**

*Items for the experience sampling measurement*

|  | **Items** | **Reference** |
| --- | --- | --- |
| **Emotion Regulation Strategy** | **Please focus on the negative emotions that you experience most right now. We would like to know how you deal with these current, most negative feelings.** |  |
| acceptance | I accept my emotions. | Emotion Regulation Skills Questionnaire (SEK-27; Berking and Znoj, 2008) |
|  | I am able to accept also negative emotions. |
|  | I can stand by my emotions. |
| reappraisal | I think that I can become a stronger person as a result of what has happened. | Cognitive Emotion Regulation Questionnaire (CERQ; Loch et al., 2011) |
|  | I think that the situation also has its positive sides. |
|  | I look for the positive sides to the matter. |
| rumination | I think about how I feel about what I have experienced. |
|  | I am preoccupied with what I think and feel about what I have experienced. |
|  | I want to understand why I feel the way I do about what I have experienced. |
| suppression | I keep my emotions to myself. | Emotion Regulation Questionnaire (ERQ; Abler and Kessler, 2009) |
|  | When I am feeling negative emotions, I make sure not to express them. |
|  | I control my emotions by not expressing them. |
|  |  |  |
| **state paranoia** | **How much do the following statements apply to you at the moment?** | Brief State Paranoia Checklist (Freeman et al., 2005; Schlier et al., 2016) |
|  | I need to be on my guard against others. |
|  | People are trying to make me upset. |
|  | Strangers and friends look at me critically. |
|  | People are laughing at me. |  |
|  | My actions and thoughts might be controlled by others. |  |
|  |  |  |
| **negative affect** | sad / depressed / miserable / dejected | see Stemmler et al. (2001) |
|  | frightened / timid / afraid / scared |
|  | angry / annoyed / mad / sore |
|  | embarrassed / ridiculed / ashamed / foolish |

**Table S2**

*Fixed effects of the MLMs predicting negative affect and paranoia by acute increases in ER*

|  |  | negative affect t | paranoia t |
| --- | --- | --- | --- |
| acceptance | *b* | -1.140 | -0.997 |
|  | *SE* | 0.315 | 0.387 |
|  | 95% CI | [-1.758, -0.522] | [-1.756, -0.237] |
|  | *p* | <.001 | .010 |
|  | β | -0.077 | -0.048 |
| reappraisal | *b* | -1.295 | -0.105 |
|  | *SE* | 0.420 | 0.353 |
|  | 95% CI | [-2.148, -0.442] | [-0.834, 0.624] |
|  | *p* | .004 | .769 |
|  | β | -0.094 | -0.005 |
| rumination | *b* | 0.930 | 1.110 |
|  | SE | 0.440 | 0.443 |
|  | 95% CI | [0.028, 1.831] | [0.207, 2.013] |
|  | *p* | .044 | .018 |
|  | β | 0.065 | 0.055 |
| suppression | *b* | 1.128 | 1.528 |
|  | *SE* | 0.389 | 0.484 |
|  | 95% CI | [0.317, 1.939] | [0.536, 2.520] |
|  | *p* | .009 | .004 |
|  | β | 0.082 | 0.078 |
| outcome variable t-1 | *b* | 0.424 | 0.404 |
|  | *SE* | 0.036 | 0.034 |
|  | 95% CI | [0.351, 0.496] | [0.335, 0.473] |
|  | *p* | <.001 | <.001 |
|  | β | 0.424 | 0.404 |

*Note.*MLM= multi-level model; ER= emotion regulation. ER strategies are conceptualized as an acute increase in the intensity of the strategy from t-1 until t. β = standardized coefficient.
